# Supplementary material for: Conflictual influence of humidity during shelter selection of the American cockroach (Periplaneta americana)
Source: PubMed Central journal article supplement (PMC6937323; doi:10.1038/s41598-019-56504-w), 2019-12-30
Supplement: 41598_2019_56504_MOESM1_ESM.pdf [file 41598_2019_56504_MOESM1_ESM.pdf]

# 1 Conflictual influence of humidity during shelter 2 selection of the American cockroach (*Periplaneta* 3 *americana*)

4 Mariano Calvo Martín<sup>1,2\*</sup>, Stamatios C. Nicolis<sup>1</sup>, Isaac Planas-Sitjà<sup>3</sup>, and Jean-Louis  
5 Deneubourg<sup>1</sup>

6 <sup>1</sup>Biological and Artificial Self-organised Systems Team, Université Libre de Bruxelles, Brussels, Belgium

7 <sup>2</sup>Evolutionary Biology & Ecology Unit, Université Libre de Bruxelles, Brussels, Belgium

8 <sup>3</sup>Systematic Zoology Laboratory, Tokyo Metropolitan University, 1-1 Minami-Osawa, Hachioji, Tokyo, 192-0397,  
9 Japan

10 \*mcalvoma@ulb.ac.be

## 11 Differences between leaving rates from the shelters

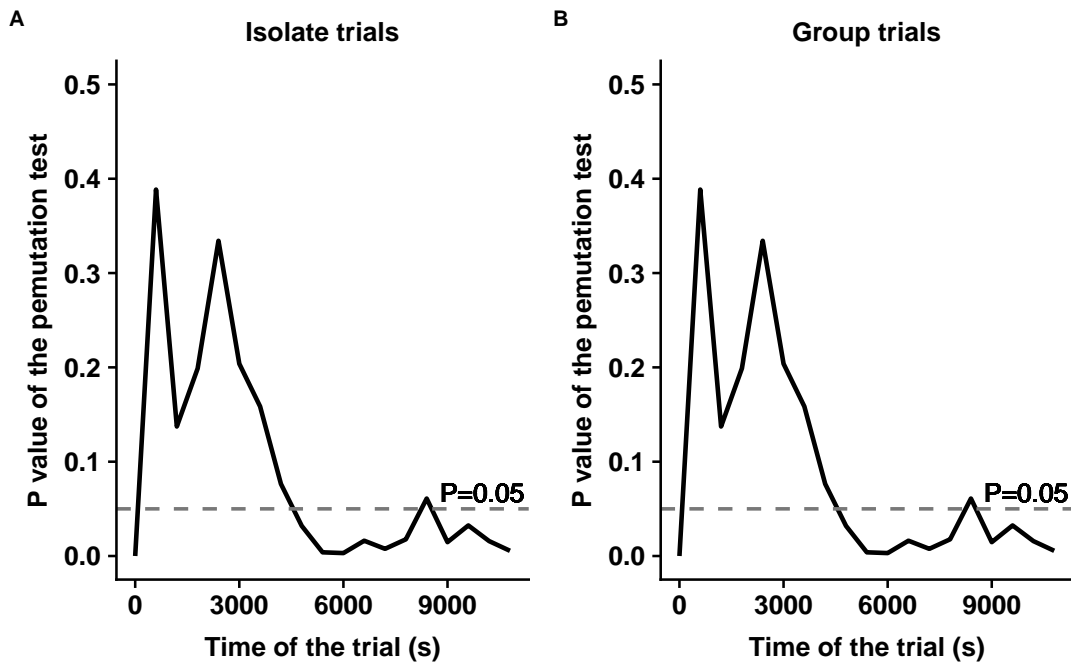

**Figure S1.** P values of permutations tests of the number of wins of a shelter over time. The dashed horizontal line indicates statistical significance at  $\alpha = 0.05$ . (A) Wins of the WS for the isolate trials. (B) Wins of the DS for the group trials.

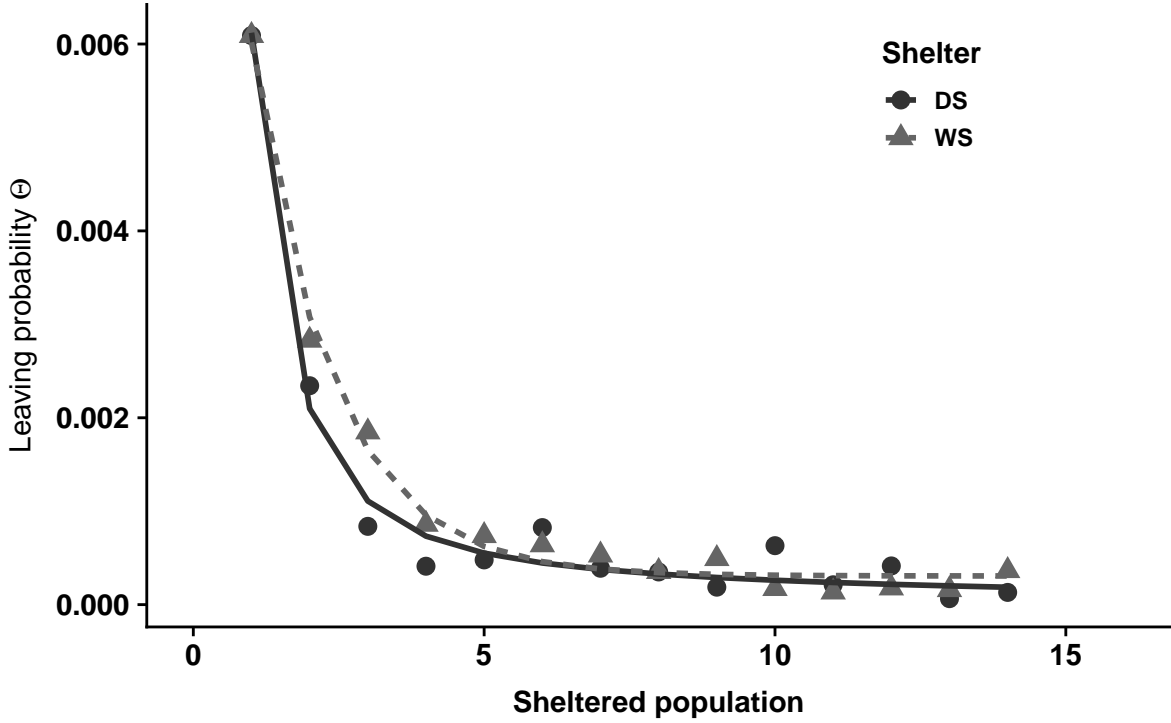

**Figure S2.** Probability of leaving the shelter as a function of the number of sheltered individuals in the DS (dark grey dot) and the WS (light grey dot) and their respective fitted values from nonlinear least square fitting (DS: dark grey dashed line and WS: light grey dashed line) (for fitted parameters, see table 2).

## 12 Differences between leaving rates from the shelters

13 Being understand that  $\varepsilon_w = \varepsilon_d$  and  $\beta_w = \beta_d$  the difference between individual leaving rates from the DW and the DS (eq. 11)  
 14 is:

$$\Delta\Theta(i_d) = \varepsilon(e^{-\gamma_w(i_w-1)} - e^{-\gamma_d(i_d-1)}) \quad (S1)$$

15 Eq. S1 displays a maximum at:

$$i = 1 + \frac{\ln \frac{\gamma_w}{\gamma_d}}{\gamma_w - \gamma_d} \quad (S2)$$

16 Figure S3 shows this difference as a function of the sheltered individuals for the values of  $\gamma_w$  and  $\gamma_d$ . The largest differences  
 17 between the leaving rates from WS and DS are between 2 and 6 sheltered individuals. For larger sheltered population these  
 18 differences become negligible. This is true for the values  $\gamma_w(\gamma_d)$  estimated from the non-linear fitting and from the simulation  
 19 (see table 2 and section model).  
 20

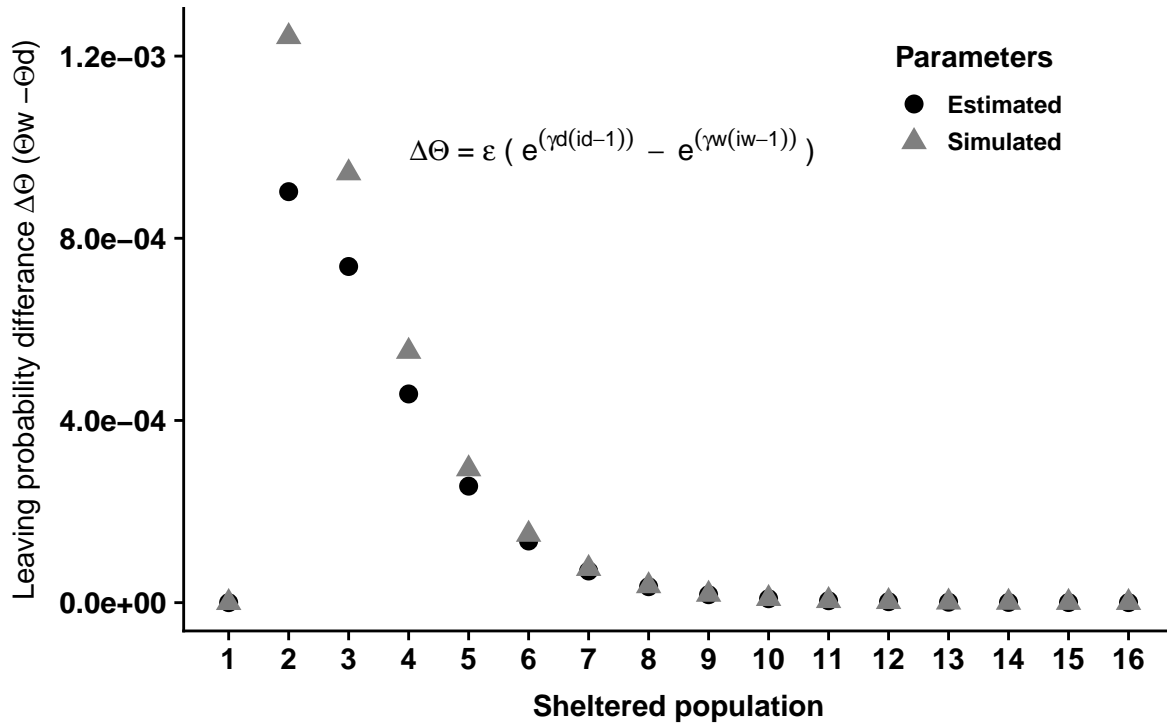

**Figure S3.** Difference of leaving probabilities  $\Delta\Theta (\Theta_w - \Theta_d)$  as a function of the number of sheltered individuals for the estimated parameters from table 2 (black dot,  $\varepsilon = 5.8 \times 10^{-3}$ ;  $\gamma_d = 1.051$ ;  $\gamma_w = 0.72$ ) and for the simulated values (light grey triangle,  $\varepsilon = 5.8 \times 10^{-3}$ ;  $\gamma_d = 1.3$ ;  $\gamma_w = 0.72$ ).
